# Supplementary material for: Integrative genetic and single cell RNA sequencing analysis provides new clues to the amyotrophic lateral sclerosis neurodegeneration
Source: Front Neurosci. 2023 Feb 17;17:1116087. doi: 10.3389/fnins.2023.1116087 (PMC9983639; doi:10.3389/fnins.2023.1116087)
Supplement: Supplementary file 1 [file Table_1.XLSX]

## Sheet: Table S1
Gene symbol	Mechanism	Reference	Related disease	MIM number	Inheritance
ALS2	Loss of function	PubMed: 16321985	Amyotrophic lateral sclerosis 2, juvenile	205100	AR
ANG	Unknown	-	Amyotrophic lateral sclerosis 9	611895	-
ANXA11	Unknown	-	Amyotrophic lateral sclerosis 23	617839	AD
ATXN2	Loss of function	PubMed: 18250099	Amyotrophic lateral sclerosis	183090	AD
C9orf72	Loss of function	PubMed: 26989253	Frontotemporal dementia and/or amyotrophic lateral sclerosis 1	105550	AD
CCNF	Unknown	-	Frontotemporal dementia and/or amyotrophic lateral sclerosis 5	619141	AD
CHCHD10	Unknown	-	Frontotemporal dementia and/or amyotrophic lateral sclerosis 2	615911	AD
CHMP2B	Unknown	-	Frontotemporal dementia and/or amyotrophic lateral sclerosis 7	600795	AD
CYLD	Loss of function	PubMed: 18382763	Frontotemporal dementia and/or amyotrophic lateral sclerosis 8	619132	AD
DCTN1	Unknown	-	Amyotrophic lateral sclerosis	105400	AD, AR
ERBB4	Loss of function	PubMed: 10655590	Amyotrophic lateral sclerosis 19	615515	AD
FIG4	Gained of function	PubMed: 22131434	Amyotrophic lateral sclerosis 11	612577	AD
FUS	Loss of function	PubMed: 23867462	Amyotrophic lateral sclerosis 6, with or without frontotemporal dementia	608030	-
HNRNPA1	Unknown	-	Amyotrophic lateral sclerosis 20	615426	AD
KIF5A	Unknown	-	Amyotrophic lateral sclerosis	617921	AD
MATR3	Unknown	-	Amyotrophic lateral sclerosis 21	606070	AD
NEFH	Gained of function	PubMed: 27040688	Amyotrophic lateral sclerosis	105400	AD, AR
NEK1	Loss of function	PubMed: 18843199	Amyotrophic lateral sclerosis, susceptibility to, 24	617892	AD
OPTN	Loss of function	PubMed: 20388642	Amyotrophic lateral sclerosis 12, with or without frontotemporal dementia	613435	AD, AR
PFN1	Loss of function	PubMed: 11274401	Amyotrophic lateral sclerosis 18	614808	-
PRPH	Loss of function	PubMed: 15132161	Amyotrophic lateral sclerosis	105400	AD, AR
SETX	Unknown	-	Amyotrophic lateral sclerosis 4, juvenile	602433	AD
SIGMAR1	Loss of function	PubMed: 25678561	Amyotrophic lateral sclerosis 16, juvenile	614373	AR
SOD1	Gained of function	PubMed: 8673102	Amyotrophic lateral sclerosis 1	105400	AD, AR
SPG11	Unknown	-	Amyotrophic lateral sclerosis 5, juvenile	602099	AR
SQSTM1	Unknown	PubMed: 29959261	Frontotemporal dementia and/or amyotrophic lateral sclerosis 3	616437	AD
TARDBP	Loss of function	PubMed: 18396105	Amyotrophic lateral sclerosis 10, with or without FTD	612069	AD
TBK1	Loss of function	PubMed: 14679297	Frontotemporal dementia and/or amyotrophic lateral sclerosis 4	616439	AD
TUBA4A	Unknown	-	Amyotrophic lateral sclerosis 22, with or without frontotemporal dementia	616208	AD
UBQLN2	Unknown	-	Amyotrophic lateral sclerosis 15, with or without frontotemporal dementia	300857	XLD
VAPB	Gained of function	PubMed: 26362257	Amyotrophic lateral sclerosis 8	608627	AD
VCP	Unknown	PubMed: 20147319	Frontotemporal dementia and/or amyotrophic lateral sclerosis 6	613954	AD

## Sheet: Table S2
Gene symbol	Related disease
BSCL2	HMN
DCTN1	HMN
DNAJB2	HMN
FBXO38	HMN
GARS	HMN
HSPB1	HMN
HSPB3	HMN
HSPB8	HMN
IGHMBP2	HMN
PLEKHG5	HMN
REEP1	HMN
SIGMAR1	HMN
SLC5A7	HMN
TRPV4	HMN
AFG3L2	SA
ATXN1	SA
ATXN10	SA
ATXN2	SA
ATXN3	SA
ATXN7	SA
ATXN8	SA
ATXN8OS	SA
BEAN	SA
CACNA1A	SA
CACNA1G	SA
CCDC88C	SA
DAB1	SA
EEF2	SA
ELOVL4	SA
ELOVL5	SA
FAT2	SA
FGF14	SA
GRM1	SA
ITPR1	SA
KCNC3	SA
KCND3	SA
MME	SA
NOP56	SA
PDYN	SA
PLD3	SA
PPP2R2B	SA
PRKCG	SA
PUM1	SA
SPTBN2	SA
STUB1	SA
TBP	SA
TGM6	SA
TMEM240	SA
TRPC3	SA
TTBK2	SA
ACP33	SPG
ALDH18A1	SPG
AMPD2	SPG
AP4B1	SPG
AP4E1	SPG
AP4M1	SPG
AP4S1	SPG
AP5Z1	SPG
ARL6IP1	SPG
ATL1	SPG
ATP13A2	SPG
B4GALNT1	SPG
BSCL2	SPG
C19orf12	SPG
CAPN1	SPG
CPT1C	SPG
CYP2U1	SPG
CYP7B1	SPG
DDHD1	SPG
DDHD2	SPG
DSTYK	SPG
ENTPD1	SPG
ERLIN1	SPG
ERLIN2	SPG
FA2H	SPG
FARS2	SPG
GBA2	SPG
GJC2	SPG
HPDL	SPG
HSPD1	SPG
IBA57	SPG
KIF1A	SPG
KIF5A	SPG
L1CAM	SPG
MAG	SPG
MTRFR	SPG
NIPA1	SPG
NT5C2	SPG
PCYT2	SPG
PGN	SPG
PLP1	SPG
PNPLA6	SPG
REEP1	SPG
RTN2	SPG
SELENOI	SPG
SLC33A1	SPG
SPAST	SPG
SPG11	SPG
SPG20	SPG
TECPR2	SPG
TFG	SPG
UBAP1	SPG
UCHL1	SPG
VPS37A	SPG
WASHC5	SPG
ZFYVE26	SPG
ZFYVE27	SPG
AR	SMA
ASAH1	SMA
ASCC1	SMA
ATP7A	SMA
BICD2	SMA
CHCHD10	SMA
DNAJB2	SMA
DYNC1H1	SMA
GARS1	SMA
IGHMBP2	SMA
PLEKHG5	SMA
SIGMAR1	SMA
SMN1	SMA
SMN2	SMA
TRIP4	SMA
TRPV4	SMA
UBA1	SMA
VAPBC	SMA

## Sheet: Table S3
Gene symbol	Related disease	Reference
ACSL5	ALS	PMID: 32968195
ALCAM	ALS	PMID: 24529757
ATXN1	ALS	PMID: 24529757	PMID: 24529757
ATXN3	ALS	PMID: 32968195
B4GALNT1	ALS	PMID: 33113361
C21orf2	ALS	PMID: 27455348
C9orf72	ALS	PMID: 24256812	PMID: 24529757	PMID: 20801718	PMID: 28931804	PMID: 32968195
CABIN1	ALS	PMID: 23624525
CAMK1G	ALS	PMID: 23624525
CFAP410	ALS	PMID: 34873335
CLCN3	ALS	PMID: 33640203
CNTN4	ALS	PMID: 24529757
COG3	ALS	PMID: 34873335
CRYZ	ALS	PMID: 31872054
DPP6	ALS	PMID: 20801717
ERGIC1	ALS	PMID: 32968195
FGD4	ALS	PMID: 31872054
FGGY	ALS	PMID: 20801717
FNBP1	ALS	PMID: 32968195
G2E3	ALS	PMID: 33640203
GGNBP2	ALS	PMID: 28931804
GPR133	ALS	PMID: 24529757
GPX3	ALS	PMID: 28931804
IFNK	ALS	PMID: 20801718	PMID: 33113361
INPP5B	ALS	PMID: 24529757
ITGA9	ALS	PMID: 24529757
ITPR2	ALS	PMID: 24529757	PMID: 20801717
KIF5A	ALS	PMID: 29566793	PMID: 32968195
MOB3B	ALS	PMID: 33113361
MOBKL2B	ALS	PMID: 20801718
MOBP	ALS	PMID: 28931804	PMID: 27455348
MYO18B	ALS	PMID: 24529757
NEK1	ALS	PMID: 29566793
OPCML	ALS	PMID: 24529757
PFKP	ALS	PMID: 24529757
PTPRN2	ALS	PMID: 34873335
RAPGEF5	ALS	PMID: 32968195
SARM1	ALS	PMID: 28931804	PMID: 27455348
SCFD1	ALS	PMID: 28931804	PMID: 27455348	PMID: 32968195
SCL9A8	ALS	PMID: 34873335
SOD1	ALS	PMID: 24529757	PMID: 20801718
SPATA2	ALS	PMID: 34873335
SUSD2	ALS	PMID: 23624525
TBK1	ALS	PMID: 29566793
TNIP1	ALS	PMID: 28931804	PMID: 32968195
TYW3	ALS	PMID: 31872054
UNC13A	ALS	PMID: 20801717	PMID: 28931804
ZDHHC6	ALS	PMID: 33113361

## Sheet: Table S4
Datasets	Species	Tissues	Cell numbers	Cell types	References	Used for
1	Mus musculus	Brain and spinal cord	156049	73	Rosenberg et al.	Discovery
2	Homo sapiens	Muscles	22058	16	De Micheli et al.	Discovery
3	Mus musculus	Spinal cord	66178	15	Milich et al.	Replication
4	Mus musculus	Lumbar spinal cord	17354	7	Sathyamurthy et al.	Replication
5	Mus musculus	Brain	9970	24	Skene et al.	Replication

## Sheet: Table S5
Gene number	FDR P-value	P-value
5	0.0252	0.0018
6	0.0196	0.0014
7	0.0182	0.0013
8	0.0252	0.0018
9	0.0252	0.0018
10	0.0014	0.0001
11	0.0028	0.0002
12	0.0014	0.0001
13	0.0014	0.0001
14	0.0014	0.0001
15	0.0014	0.0001
16	0.0014	0.0001
17	0.0014	0.0001
18	0.0014	0.0001
19	0.0028	0.0002
20	0.0014	0.0001
21	0.0014	0.0001
22	0.0028	0.0002
23	0.0014	0.0001
24	0.0014	0.0001
25	0.0014	0.0001
26	0.0028	0.0002
27	0.0042	0.0003
28	0.0014	0.0001
29	0.007	0.0005
30	0.0014	0.0001
31	0.0014	0.0001
32	0.0042	0.0003

## Sheet: Table S6
Gene symbol	Panel
ANK2	HI
APC	HI
BCL11B	HI
CD2AP	HI
COMT	HI
CSF2RA	HI
DMPK	HI
DYRK1A	HI
EGR1	HI
EHMT1	HI
FGF10	HI
FOXP1	HI
FOXP2	HI
GCH1	HI
GHRL	HI
GTF2I	HI
HOXD13	HI
IGF1	HI
KCNQ2	HI
LMX1B	HI
MAPT	HI
MC4R	HI
NF1	HI
NKX2-5	HI
NLGN4X	HI
NLRP3	HI
NPAS3	HI
NSD1	HI
PARK2	HI
PAX6	HI
PIK3R1	HI
PRODH	HI
PTEN	HI
RELN	HI
SATB2	HI
SCN1A	HI
SEMA5A	HI
SHFM1	HI
SHMT1	HI
SNCA	HI
SPR	HI
ST7	HI
TBX1	HI
TCF4	HI
TGFB1	HI
TPM1	HI
TSC1	HI
TSC2	HI
WWOX	HI
A2M	LoFT
ABCA10	LoFT
ABCA8	LoFT
ABCC11	LoFT
ABCC12	LoFT
ABHD12B	LoFT
ABHD14B	LoFT
ACSBG2	LoFT
ACSM2A	LoFT
ACSM2B	LoFT
ACSM3	LoFT
ADAM2	LoFT
ADPRHL1	LoFT
ADSSL1	LoFT
AHNAK2	LoFT
AKAP3	LoFT
ALDH1B1	LoFT
ANKRD30A	LoFT
ANKRD35	LoFT
ANO5	LoFT
AP1G2	LoFT
APIP	LoFT
APOBEC3A	LoFT
APOBEC3B	LoFT
ASB15	LoFT
ASPSCR1	LoFT
ATP10B	LoFT
ATP11A	LoFT
ATP12A	LoFT
ATP2C2	LoFT
BPHL	LoFT
BPIFA3	LoFT
BTN3A3	LoFT
BTNL2	LoFT
BTNL8	LoFT
BTNL9	LoFT
C10orf53	LoFT
C11orf40	LoFT
C1orf127	LoFT
C2orf40	LoFT
C3orf14	LoFT
C4orf46	LoFT
C4orf50	LoFT
C6	LoFT
CABYR	LoFT
CAPN9	LoFT
CARD6	LoFT
CCDC121	LoFT
CCDC13	LoFT
CCDC60	LoFT
CCDC66	LoFT
CD180	LoFT
CD36	LoFT
CD96	LoFT
CDH19	LoFT
CDK11A	LoFT
CDKL2	LoFT
CELA1	LoFT
CEP72	LoFT
CES1	LoFT
CES5A	LoFT
CFHR1	LoFT
CFHR2	LoFT
CFHR3	LoFT
CHD1L	LoFT
CHIT1	LoFT
CHPF2	LoFT
CLCN1	LoFT
CLYBL	LoFT
CNKSR1	LoFT
COL16A1	LoFT
COL6A2	LoFT
COL6A5	LoFT
CPXM2	LoFT
CROT	LoFT
CRYGN	LoFT
CRYZ	LoFT
CSH1	LoFT
CTSE	LoFT
CYP2A6	LoFT
CYP2C8	LoFT
CYP2D6	LoFT
CYP2F1	LoFT
CYP3A5	LoFT
CYP4B1	LoFT
DCDC2B	LoFT
DCHS2	LoFT
DDX60	LoFT
DEFB126	LoFT
DHDH	LoFT
DMBT1	LoFT
DNAH7	LoFT
DQX1	LoFT
DUOX2	LoFT
ECT2L	LoFT
EFCAB13	LoFT
EFCAB3	LoFT
EFCAB5	LoFT
EFCAB6	LoFT
ENOSF1	LoFT
ENPEP	LoFT
EPPK1	LoFT
EPX	LoFT
ERAP1	LoFT
ERV3-1	LoFT
EXO5	LoFT
FAM129C	LoFT
FAM151A	LoFT
FAM187B	LoFT
FAM45A	LoFT
FAM81B	LoFT
FCGBP	LoFT
FCGR2A	LoFT
FCN3	LoFT
FLG	LoFT
FLG2	LoFT
FMO2	LoFT
FRG2B	LoFT
FUT2	LoFT
FUT6	LoFT
GADL1	LoFT
GBGT1	LoFT
GBP3	LoFT
GBP4	LoFT
GCFC2	LoFT
GH2	LoFT
GJB4	LoFT
GLB1L2	LoFT
GMPR	LoFT
GOLGA8S	LoFT
GP6	LoFT
GPATCH2L	LoFT
GRIN3B	LoFT
GRK7	LoFT
GYPB	LoFT
HELB	LoFT
HK3	LoFT
HLA-B	LoFT
HLA-DPA1	LoFT
HPSE	LoFT
HRG	LoFT
HRNR	LoFT
IDI2	LoFT
IFIH1	LoFT
IFNK	LoFT
IL17RC	LoFT
IL3RA	LoFT
IQCH	LoFT
ITIH1	LoFT
KIAA0753	LoFT
KIAA1257	LoFT
KIAA1586	LoFT
KIR3DL1	LoFT
KLK14	LoFT
KLK3	LoFT
KRT4	LoFT
KRT77	LoFT
KRT83	LoFT
LMF2	LoFT
LMO7	LoFT
LPA	LoFT
LRRC39	LoFT
LRTM1	LoFT
MANEA	LoFT
MAP3K4	LoFT
MAZ	LoFT
MCF2L	LoFT
MCOLN3	LoFT
MFSD9	LoFT
MGAM	LoFT
MLANA	LoFT
MMP10	LoFT
MOGAT1	LoFT
MOK	LoFT
MOXD1	LoFT
MS4A6A	LoFT
MST1	LoFT
MUC17	LoFT
MUC6	LoFT
MUTYH	LoFT
MYBBP1A	LoFT
MYH1	LoFT
MYH13	LoFT
MYH8	LoFT
MYO1A	LoFT
MYOC	LoFT
MYOF	LoFT
NAALAD2	LoFT
NBPF14	LoFT
NBPF15	LoFT
NEIL1	LoFT
NLRP13	LoFT
NLRP9	LoFT
NOP16	LoFT
NUDT8	LoFT
OARD1	LoFT
OBSCN	LoFT
OCEL1	LoFT
OR8S1	LoFT
PAPLN	LoFT
PDE11A	LoFT
PDIA2	LoFT
PGPEP1L	LoFT
PHRF1	LoFT
PKD1L2	LoFT
PKHD1L1	LoFT
PLA2G2C	LoFT
PLA2G4D	LoFT
PLA2R1	LoFT
PLEKHG7	LoFT
PLIN4	LoFT
PNLIPRP3	LoFT
POLM	LoFT
POTEH	LoFT
PPEF2	LoFT
PPL	LoFT
PPP1R3A	LoFT
PRAMEF2	LoFT
PRB1	LoFT
PRB2	LoFT
PRB4	LoFT
PSG1	LoFT
PSG11	LoFT
PSG4	LoFT
PSG9	LoFT
PTCHD3	LoFT
PTGDR	LoFT
PXDNL	LoFT
PZP	LoFT
RAI1	LoFT
RERGL	LoFT
RETSAT	LoFT
RFPL1	LoFT
RGPD4	LoFT
RGS11	LoFT
RHD	LoFT
RNF32	LoFT
ROPN1B	LoFT
RP1L1	LoFT
RPTN	LoFT
RTKN2	LoFT
RTP1	LoFT
SAMD11	LoFT
SEMG2	LoFT
SERHL2	LoFT
SERPINA10	LoFT
SERPINA9	LoFT
SERPINB3	LoFT
SFI1	LoFT
SIGLEC1	LoFT
SIGLEC5	LoFT
SLC17A9	LoFT
SLC22A10	LoFT
SLC22A14	LoFT
SLC22A25	LoFT
SLC26A10	LoFT
SLC5A4	LoFT
SLCO1B1	LoFT
SLFN13	LoFT
SPATA31A6	LoFT
SPATA4	LoFT
SPATC1	LoFT
SPNS3	LoFT
SULT1A2	LoFT
SULT1C4	LoFT
SYNM	LoFT
SYTL2	LoFT
TAF6	LoFT
TCF3	LoFT
TCHHL1	LoFT
TEKT3	LoFT
TGM4	LoFT
THBS4	LoFT
THEM5	LoFT
TIGD6	LoFT
TLR10	LoFT
TLR5	LoFT
TMC2	LoFT
TMEM82	LoFT
TMIE	LoFT
TMPRSS7	LoFT
TNN	LoFT
TRIM22	LoFT
TRIM45	LoFT
TRIM48	LoFT
TRIM59	LoFT
TRMT10B	LoFT
TRMT2A	LoFT
TTC38	LoFT
TTN	LoFT
UGT2B10	LoFT
UGT2B17	LoFT
UGT2B28	LoFT
UMODL1	LoFT
UNC93A	LoFT
UPB1	LoFT
UPK3A	LoFT
UPP2	LoFT
USP45	LoFT
USP6	LoFT
VILL	LoFT
VWA3B	LoFT
VWA7	LoFT
WDR27	LoFT
WDR90	LoFT
XIRP1	LoFT
XRRA1	LoFT
ZAN	LoFT
ZNF223	LoFT
ZNF229	LoFT
ZNF257	LoFT
ZNF30	LoFT
ZNF343	LoFT
ZNF396	LoFT
ZNF417	LoFT
ZNF486	LoFT
ZNF528	LoFT
ZNF544	LoFT
ZNF587	LoFT
ZNF599	LoFT
ZNF611	LoFT
ZNF790	LoFT
ZNF83	LoFT
ZNF831	LoFT
ZNF844	LoFT
ZNF846	LoFT
ZNF860	LoFT
ZNF878	LoFT
ZNF92	LoFT
ZRANB3	LoFT
AAAS	NNN
AASS	NNN
ABCA4	NNN
ABCB4	NNN
ABCB7	NNN
ABCC2	NNN
ABCC6	NNN
ABCC8	NNN
ABCC9	NNN
ABCD1	NNN
ABHD5	NNN
ACAN	NNN
ACAT1	NNN
ACTA2	NNN
ACTC1	NNN
ACTG1	NNN
ACTN2	NNN
ACTN4	NNN
ACVR1	NNN
ACVR2B	NNN
ACVRL1	NNN
ADAM9	NNN
ADAMTS10	NNN
ADAMTS17	NNN
ADCK3	NNN
ADD1	NNN
ADH1C	NNN
ADRB3	NNN
AFG3L2	NNN
AGA	NNN
AGL	NNN
AGPAT2	NNN
AGPS	NNN
AGT	NNN
AGTR1	NNN
AGXT	NNN
AHCY	NNN
AIP	NNN
AIPL1	NNN
AK1	NNN
AK2	NNN
AKR1D1	NNN
AKT2	NNN
ALAS2	NNN
ALDH3A2	NNN
ALG1	NNN
ALG10	NNN
ALG11	NNN
ALG12	NNN
ALG3	NNN
ALG6	NNN
ALG8	NNN
ALG9	NNN
ALMS1	NNN
ALOX12B	NNN
ALOX5AP	NNN
ALOXE3	NNN
ALPL	NNN
ALS2	NNN
AMACR	NNN
AMELX	NNN
ANG	NNN
AP3B1	NNN
AP5Z1	NNN
APOA1	NNN
APOA5	NNN
APOL1	NNN
ARFGEF2	NNN
ARG1	NNN
ARHGAP26	NNN
ARHGEF12	NNN
ARHGEF9	NNN
ARL6	NNN
ARSA	NNN
ARSB	NNN
ASAH1	NNN
ASL	NNN
ASPA	NNN
ASPM	NNN
ASPSCR1	NNN
ASS1	NNN
ATG16L1	NNN
ATL1	NNN
ATM	NNN
ATN1	NNN
ATP1A2	NNN
ATP2A1	NNN
ATP2C1	NNN
ATP7A	NNN
ATP7B	NNN
ATR	NNN
ATRX	NNN
ATXN10	NNN
ATXN8OS	NNN
AURKA	NNN
AVP	NNN
AVPR2	NNN
AXIN1	NNN
AXIN2	NNN
B4GALT1	NNN
B4GALT7	NNN
BARD1	NNN
BBS1	NNN
BBS10	NNN
BBS12	NNN
BBS2	NNN
BBS4	NNN
BBS5	NNN
BBS7	NNN
BBS9	NNN
BCKDHA	NNN
BCKDHB	NNN
BCL10	NNN
BCOR	NNN
BCR	NNN
BCS1L	NNN
BEAN1	NNN
BEST1	NNN
BLK	NNN
BLM	NNN
BLNK	NNN
BMP15	NNN
BMP2	NNN
BMP4	NNN
BMPR2	NNN
BRAF	NNN
BRCA1	NNN
BRCA2	NNN
BSCL2	NNN
BSND	NNN
BTD	NNN
BTK	NNN
BUB1B	NNN
C10orf2	NNN
C2orf71	NNN
C3	NNN
C5	NNN
CA2	NNN
CA4	NNN
CABP4	NNN
CACNA1S	NNN
CAPN3	NNN
CARD9	NNN
CASP10	NNN
CASP8	NNN
CAV1	NNN
CAV3	NNN
CBX2	NNN
CCDC28B	NNN
CCDC50	NNN
CCND1	NNN
CD19	NNN
CD24	NNN
CD244	NNN
CD79A	NNN
CD79B	NNN
CD81	NNN
CDAN1	NNN
CDC73	NNN
CDH1	NNN
CDH23	NNN
CDHR1	NNN
CDK5RAP2	NNN
CDKN1C	NNN
CDKN2A	NNN
CEBPA	NNN
CENPJ	NNN
CEP152	NNN
CEP290	NNN
CERKL	NNN
CFC1	NNN
CFH	NNN
CFHR1	NNN
CFHR3	NNN
CFI	NNN
CFTR	NNN
CHD7	NNN
CHEK2	NNN
CHIC2	NNN
CHM	NNN
CHMP4B	NNN
CHN1	NNN
CIITA	NNN
CISD2	NNN
CLCN1	NNN
CLCN5	NNN
CLCN7	NNN
CLCNKA	NNN
CLCNKB	NNN
CLEC7A	NNN
CLN3	NNN
CLN5	NNN
CLN6	NNN
CLN8	NNN
CLRN1	NNN
CNBP	NNN
CNGA1	NNN
CNGA3	NNN
CNGB1	NNN
CNGB3	NNN
COA5	NNN
COCH	NNN
COG1	NNN
COG4	NNN
COG5	NNN
COG7	NNN
COG8	NNN
COL10A1	NNN
COL11A2	NNN
COL1A1	NNN
COL1A2	NNN
COL2A1	NNN
COL3A1	NNN
COL4A3	NNN
COL4A4	NNN
COL4A5	NNN
COL5A1	NNN
COL5A2	NNN
COL6A1	NNN
COL6A2	NNN
COL6A3	NNN
COL8A2	NNN
COMP	NNN
COX14	NNN
COX15	NNN
COX6B1	NNN
CP	NNN
CPOX	NNN
CPS1	NNN
CRB1	NNN
CREBBP	NNN
CRTAP	NNN
CRX	NNN
CRYAB	NNN
CSRP3	NNN
CST3	NNN
CSTB	NNN
CTNS	NNN
CTSC	NNN
CYBA	NNN
CYBB	NNN
CYLD	NNN
CYP27A1	NNN
CYP2A6	NNN
CYP3A5	NNN
CYP4V2	NNN
CYP7B1	NNN
D2HGDH	NNN
DBT	NNN
DCTN1	NNN
DDB2	NNN
DES	NNN
DFNA5	NNN
DFNB31	NNN
DFNB59	NNN
DHH	NNN
DIAPH1	NNN
DIAPH2	NNN
DICER1	NNN
DKC1	NNN
DLD	NNN
DLL3	NNN
DLX3	NNN
DMD	NNN
DMP1	NNN
DNAAF1	NNN
DNAAF2	NNN
DNAH11	NNN
DNAI1	NNN
DNAI2	NNN
DNASE1	NNN
DNM2	NNN
DOLK	NNN
DPAGT1	NNN
DPM1	NNN
DPM3	NNN
DSC2	NNN
DSG2	NNN
DSP	NNN
DSPP	NNN
DUOX2	NNN
DUOXA2	NNN
DYSF	NNN
ECE1	NNN
EDA	NNN
EDAR	NNN
EDARADD	NNN
EDN3	NNN
EDNRA	NNN
EDNRB	NNN
EFHC1	NNN
EFNB1	NNN
EGFR	NNN
ELANE	NNN
ELN	NNN
EMD	NNN
EMG1	NNN
ENAM	NNN
ENG	NNN
ENPP1	NNN
EPB41	NNN
EPCAM	NNN
EPHA2	NNN
EPHX1	NNN
EPM2A	NNN
ERBB2	NNN
ERCC2	NNN
ERCC3	NNN
ERCC5	NNN
ERCC6	NNN
ESCO2	NNN
ESPN	NNN
ETV6	NNN
EVC	NNN
EVC2	NNN
EWSR1	NNN
EXT2	NNN
EYA1	NNN
EYA4	NNN
F11	NNN
F12	NNN
F13A1	NNN
F13B	NNN
F2	NNN
F5	NNN
F9	NNN
FAH	NNN
FAM134B	NNN
FAM161A	NNN
FAM83H	NNN
FANCA	NNN
FANCC	NNN
FAS	NNN
FASLG	NNN
FASTKD2	NNN
FBLN5	NNN
FBN1	NNN
FBP1	NNN
FBXO7	NNN
FCGR2B	NNN
FECH	NNN
FERMT3	NNN
FGA	NNN
FGB	NNN
FGD1	NNN
FGF14	NNN
FGF23	NNN
FGF8	NNN
FGFR2	NNN
FGFR3	NNN
FHL1	NNN
FIG4	NNN
FIGLA	NNN
FKBP10	NNN
FKRP	NNN
FKTN	NNN
FLCN	NNN
FLG	NNN
FLNA	NNN
FLNB	NNN
FLT3	NNN
FLT4	NNN
FOXC1	NNN
FOXE3	NNN
FOXF1	NNN
FOXI1	NNN
FOXL2	NNN
FOXP3	NNN
FOXRED1	NNN
FSCN2	NNN
FSHR	NNN
FUCA1	NNN
FUS	NNN
FXN	NNN
FZD4	NNN
G6PC	NNN
G6PC3	NNN
GAA	NNN
GABRG2	NNN
GALE	NNN
GALK1	NNN
GALNS	NNN
GALT	NNN
GATA1	NNN
GATA2	NNN
GATA4	NNN
GATA6	NNN
GATM	NNN
GBE1	NNN
GCGR	NNN
GCK	NNN
GCSH	NNN
GDAP1	NNN
GDF1	NNN
GDF3	NNN
GDF5	NNN
GDF6	NNN
GDNF	NNN
GFAP	NNN
GFI1	NNN
GHR	NNN
GIF	NNN
GJB1	NNN
GJB2	NNN
GJB3	NNN
GJB4	NNN
GJB6	NNN
GJC2	NNN
GLA	NNN
GLB1	NNN
GLDC	NNN
GLI2	NNN
GLI3	NNN
GLIS2	NNN
GLRX5	NNN
GLUD1	NNN
GM2A	NNN
GMPS	NNN
GNAS	NNN
GNAS-AS1	NNN
GNAT1	NNN
GNB3	NNN
GNE	NNN
GNPAT	NNN
GNS	NNN
GOLGA5	NNN
GP1BA	NNN
GP1BB	NNN
GP9	NNN
GPC3	NNN
GPD2	NNN
GPI	NNN
GPR143	NNN
GPR98	NNN
GRHL2	NNN
GRHPR	NNN
GRK1	NNN
GRM6	NNN
GRXCR1	NNN
GSN	NNN
GTF2H5	NNN
GUCA1A	NNN
GUCY2D	NNN
GUSB	NNN
GYG1	NNN
H19	NNN
HABP2	NNN
HADH	NNN
HAMP	NNN
HAX1	NNN
HBA1	NNN
HBA2	NNN
HBB	NNN
HCCS	NNN
HCN4	NNN
HES7	NNN
HEXA	NNN
HEXB	NNN
HFE2	NNN
HGD	NNN
HGSNAT	NNN
HLCS	NNN
HMBS	NNN
HMCN1	NNN
HMGA1	NNN
HMMR	NNN
HNF1A	NNN
HNF1B	NNN
HNF4A	NNN
HOGA1	NNN
HPD	NNN
HPGD	NNN
HPRT1	NNN
HPS1	NNN
HR	NNN
HSPB1	NNN
HSPB3	NNN
HSPB8	NNN
HSPD1	NNN
HTRA1	NNN
HTRA2	NNN
ICOS	NNN
IDH2	NNN
IDH3B	NNN
IDS	NNN
IDUA	NNN
IFNG	NNN
IFT122	NNN
IFT80	NNN
IGF2BP2	NNN
IGHM	NNN
IGLL1	NNN
IHH	NNN
IKBKAP	NNN
IKBKG	NNN
IL10	NNN
IL10RA	NNN
IL10RB	NNN
IL1B	NNN
IL23R	NNN
IL2RG	NNN
IL6	NNN
IMPDH1	NNN
IMPG2	NNN
INF2	NNN
INS	NNN
INSL3	NNN
INSR	NNN
INVS	NNN
IQCB1	NNN
IRF1	NNN
IRF4	NNN
IRF5	NNN
IRF6	NNN
IRS1	NNN
IRS2	NNN
ITGA7	NNN
ITGB2	NNN
ITPKC	NNN
ITPR1	NNN
IVD	NNN
JAG1	NNN
JAK2	NNN
JUP	NNN
KCNA1	NNN
KCNA5	NNN
KCNC3	NNN
KCNE1	NNN
KCNE2	NNN
KCNE3	NNN
KCNH2	NNN
KCNJ1	NNN
KCNJ10	NNN
KCNJ11	NNN
KCNJ2	NNN
KCNJ5	NNN
KCNQ1	NNN
KCNQ1OT1	NNN
KCNQ4	NNN
KCTD7	NNN
KIAA0196	NNN
KIF1B	NNN
KIF5A	NNN
KIF7	NNN
KIT	NNN
KLF1	NNN
KLF11	NNN
KLF6	NNN
KLHDC8B	NNN
KLK4	NNN
KRAS	NNN
KRT1	NNN
KRT10	NNN
KRT13	NNN
KRT16	NNN
KRT17	NNN
KRT4	NNN
KRT6A	NNN
KRT6B	NNN
KRT81	NNN
KRT83	NNN
KRT86	NNN
L2HGDH	NNN
LAMA2	NNN
LAMP2	NNN
LARGE	NNN
LBR	NNN
LCA5	NNN
LCAT	NNN
LDB3	NNN
LEMD3	NNN
LEPRE1	NNN
LFNG	NNN
LHFPL5	NNN
LIG4	NNN
LIPI	NNN
LITAF	NNN
LMBR1	NNN
LMBRD1	NNN
LOXHD1	NNN
LOXL1	NNN
LPL	NNN
LPP	NNN
LRAT	NNN
LRP5	NNN
LRRC8A	NNN
LRTOMT	NNN
LTBP2	NNN
LTBP3	NNN
LYST	NNN
LYZ	NNN
LZTS1	NNN
MAMLD1	NNN
MAN2B1	NNN
MANBA	NNN
MAP3K1	NNN
MAP3K8	NNN
MAPK10	NNN
MAPK8IP1	NNN
MARVELD2	NNN
MC1R	NNN
MCCC2	NNN
MCOLN1	NNN
MED25	NNN
MEFV	NNN
MEN1	NNN
MESP2	NNN
MFN2	NNN
MFSD8	NNN
MGAT2	NNN
MINPP1	NNN
MITF	NNN
MKKS	NNN
MKS1	NNN
MLH1	NNN
MLH3	NNN
MLLT10	NNN
MMAA	NNN
MMAB	NNN
MMACHC	NNN
MMADHC	NNN
MMP13	NNN
MMP20	NNN
MN1	NNN
MOGS	NNN
MPDU1	NNN
MPI	NNN
MPL	NNN
MPLKIP	NNN
MPZ	NNN
MS4A1	NNN
MSH2	NNN
MSH6	NNN
MSX1	NNN
MSX2	NNN
MTMR2	NNN
MTTP	NNN
MUC5B	NNN
MUTYH	NNN
MVK	NNN
MXI1	NNN
MYBPC3	NNN
MYC	NNN
MYH11	NNN
MYH14	NNN
MYH3	NNN
MYH6	NNN
MYH7	NNN
MYH9	NNN
MYL2	NNN
MYL3	NNN
MYLK2	NNN
MYO15A	NNN
MYO1A	NNN
MYO3A	NNN
MYO6	NNN
MYO7A	NNN
MYOC	NNN
MYOT	NNN
NBN	NNN
NCF1	NNN
NCF2	NNN
NCOA4	NNN
NCSTN	NNN
NDP	NNN
NDRG1	NNN
NDUFA10	NNN
NDUFA12	NNN
NDUFA13	NNN
NDUFA2	NNN
NDUFA9	NNN
NDUFS3	NNN
NDUFS4	NNN
NDUFS7	NNN
NDUFS8	NNN
NEFH	NNN
NEFL	NNN
NEUROD1	NNN
NEXN	NNN
NF2	NNN
NHLRC1	NNN
NIPA1	NNN
NIPBL	NNN
NKX2-6	NNN
NLRP7	NNN
NME1	NNN
NOBOX	NNN
NODAL	NNN
NOG	NNN
NOTCH1	NNN
NOTCH2	NNN
NPC2	NNN
NPHP1	NNN
NPHP3	NNN
NPHP4	NNN
NPM1	NNN
NPPA	NNN
NPR2	NNN
NR0B1	NNN
NR0B2	NNN
NR2E3	NNN
NR4A3	NNN
NR5A1	NNN
NRL	NNN
NT5C3A	NNN
NUP214	NNN
NUP62	NNN
NYX	NNN
OAS1	NNN
OAT	NNN
OCA2	NNN
OCLN	NNN
OCRL	NNN
ODC1	NNN
OFD1	NNN
OGG1	NNN
OPCML	NNN
OPN1LW	NNN
OPN1MW	NNN
OPTN	NNN
OSMR	NNN
OSTM1	NNN
OTC	NNN
OTOA	NNN
OTOF	NNN
OTX2	NNN
PABPN1	NNN
PADI4	NNN
PALB2	NNN
PANK2	NNN
PARK7	NNN
PAX3	NNN
PAX4	NNN
PAX7	NNN
PAX8	NNN
PAX9	NNN
PC	NNN
PCCA	NNN
PCCB	NNN
PCDH15	NNN
PCM1	NNN
PDE6B	NNN
PDE6C	NNN
PDE6G	NNN
PDE8B	NNN
PDGFRA	NNN
PDGFRL	NNN
PDHA1	NNN
PDX1	NNN
PDYN	NNN
PDZD7	NNN
PEX1	NNN
PEX10	NNN
PEX13	NNN
PEX14	NNN
PEX19	NNN
PEX2	NNN
PEX26	NNN
PEX3	NNN
PEX5	NNN
PFKM	NNN
PHEX	NNN
PHF6	NNN
PHGDH	NNN
PHKA2	NNN
PHKB	NNN
PHKG2	NNN
PHYH	NNN
PINK1	NNN
PITPNM3	NNN
PITX2	NNN
PKD1	NNN
PKD2	NNN
PKHD1	NNN
PLA2G2A	NNN
PLA2G6	NNN
PLAG1	NNN
PLCB1	NNN
PLOD1	NNN
PLP1	NNN
PMM2	NNN
PMP22	NNN
PNKP	NNN
PNP	NNN
PNPLA6	NNN
POLG	NNN
POLH	NNN
POLR1C	NNN
POLR1D	NNN
POMT1	NNN
POMT2	NNN
PORCN	NNN
POU3F4	NNN
POU4F3	NNN
PPARG	NNN
PPARGC1B	NNN
PPIB	NNN
PPOX	NNN
PPP1R3A	NNN
PPP2R1B	NNN
PPT1	NNN
PRCC	NNN
PRCD	NNN
PRF1	NNN
PRICKLE2	NNN
PRKAG2	NNN
PRKAR1A	NNN
PRKCG	NNN
PRKCH	NNN
PRNP	NNN
PROK2	NNN
PROKR2	NNN
PROM1	NNN
PRPF3	NNN
PRPF31	NNN
PRPF8	NNN
PRPH	NNN
PRPH2	NNN
PRPS1	NNN
PRX	NNN
PSAT1	NNN
PSENEN	NNN
PSPH	NNN
PTCH1	NNN
PTCH2	NNN
PTGIS	NNN
PTHLH	NNN
PTPN1	NNN
PTPN11	NNN
PTPN22	NNN
PTPRJ	NNN
PTPRQ	NNN
PTRF	NNN
PYGM	NNN
RAB7A	NNN
RAD51	NNN
RAD54L	NNN
RAX	NNN
RAX2	NNN
RB1	NNN
RB1CC1	NNN
RBM20	NNN
RBM8A	NNN
RD3	NNN
RDH12	NNN
RDH5	NNN
RDX	NNN
RECQL4	NNN
REEP1	NNN
REN	NNN
RET	NNN
RFT1	NNN
RFX5	NNN
RFXANK	NNN
RFXAP	NNN
RGR	NNN
RHAG	NNN
RHO	NNN
RLBP1	NNN
RMRP	NNN
RNASEH2A	NNN
RNASEH2B	NNN
RNASEH2C	NNN
RNF139	NNN
RNF6	NNN
ROBO2	NNN
ROR2	NNN
RP1	NNN
RP1L1	NNN
RP2	NNN
RP9	NNN
RPE65	NNN
RPGR	NNN
RPGRIP1	NNN
RPL11	NNN
RPL35A	NNN
RPL5	NNN
RPS10	NNN
RPS17	NNN
RPS19	NNN
RPS24	NNN
RPS7	NNN
RSPH4A	NNN
RSPH9	NNN
RSPO4	NNN
RUNX1	NNN
RUNX2	NNN
RXFP2	NNN
RYR1	NNN
RYR2	NNN
SAG	NNN
SAMHD1	NNN
SBF2	NNN
SCN1B	NNN
SCN3B	NNN
SCN4A	NNN
SCN4B	NNN
SCN5A	NNN
SCN9A	NNN
SCNN1B	NNN
SCNN1G	NNN
SCO2	NNN
SDC3	NNN
SDHA	NNN
SDHB	NNN
SDHC	NNN
SEC23B	NNN
SEMA4A	NNN
SEPN1	NNN
SERPINA1	NNN
SERPINB6	NNN
SERPING1	NNN
SETX	NNN
SFTPA1	NNN
SFTPA2	NNN
SGCA	NNN
SGCB	NNN
SGCD	NNN
SGCG	NNN
SGSH	NNN
SH2B3	NNN
SH3BP2	NNN
SH3TC2	NNN
SHH	NNN
SIM1	NNN
SIX1	NNN
SIX5	NNN
SLC11A2	NNN
SLC12A1	NNN
SLC12A3	NNN
SLC16A1	NNN
SLC16A2	NNN
SLC17A5	NNN
SLC17A8	NNN
SLC19A3	NNN
SLC22A18	NNN
SLC22A4	NNN
SLC22A5	NNN
SLC25A15	NNN
SLC25A22	NNN
SLC25A38	NNN
SLC25A4	NNN
SLC26A2	NNN
SLC26A4	NNN
SLC2A10	NNN
SLC2A4	NNN
SLC33A1	NNN
SLC34A1	NNN
SLC34A2	NNN
SLC35A1	NNN
SLC35C1	NNN
SLC37A4	NNN
SLC39A4	NNN
SLC3A1	NNN
SLC40A1	NNN
SLC45A2	NNN
SLC4A11	NNN
SLC52A3	NNN
SLC5A2	NNN
SLC5A5	NNN
SLC6A19	NNN
SLC7A9	NNN
SMAD9	NNN
SMARCB1	NNN
SMN1	NNN
SMN2	NNN
SMPD1	NNN
SNAI2	NNN
SNCB	NNN
SNRNP200	NNN
SNTA1	NNN
SOD1	NNN
SOS1	NNN
SOX10	NNN
SOX2	NNN
SOX9	NNN
SPATA7	NNN
SPG11	NNN
SPG20	NNN
SPG7	NNN
SPINK5	NNN
SPTA1	NNN
SPTAN1	NNN
SPTBN2	NNN
SPTLC1	NNN
SPTLC2	NNN
SQSTM1	NNN
SRD5A3	NNN
SRY	NNN
STAT3	NNN
STIL	NNN
STK11	NNN
STOX1	NNN
STRA6	NNN
STRC	NNN
STX11	NNN
STX16	NNN
STXBP2	NNN
SUFU	NNN
SUMF1	NNN
SUMO1	NNN
SURF1	NNN
TAP1	NNN
TAP2	NNN
TAPBP	NNN
TARDBP	NNN
TAT	NNN
TAZ	NNN
TBP	NNN
TBX20	NNN
TCAP	NNN
TCIRG1	NNN
TCOF1	NNN
TDP1	NNN
TECTA	NNN
TERC	NNN
TERT	NNN
TF	NNN
TFAP2A	NNN
TFR2	NNN
TGFB3	NNN
TGFBR1	NNN
TGFBR2	NNN
TGIF1	NNN
TGM1	NNN
THPO	NNN
THRB	NNN
TLL1	NNN
TLR2	NNN
TLR4	NNN
TMC1	NNN
TMC6	NNN
TMC8	NNN
TMEM43	NNN
TMEM67	NNN
TMIE	NNN
TMPRSS3	NNN
TMPRSS6	NNN
TNFRSF11A	NNN
TNFRSF13B	NNN
TNFRSF13C	NNN
TNFSF11	NNN
TNNC1	NNN
TNNI2	NNN
TNNI3	NNN
TNNT2	NNN
TNNT3	NNN
TOPORS	NNN
TP63	NNN
TPM2	NNN
TPO	NNN
TPP1	NNN
TPRN	NNN
TREX1	NNN
TRIM24	NNN
TRIM37	NNN
TRIOBP	NNN
TRIP11	NNN
TRPC6	NNN
TRPM1	NNN
TRPS1	NNN
TRPV4	NNN
TSG101	NNN
TTBK2	NNN
TTC8	NNN
TTN	NNN
TTR	NNN
TUBA1A	NNN
TULP1	NNN
TWIST1	NNN
TYRP1	NNN
UBR1	NNN
UCHL1	NNN
UCP1	NNN
UCP3	NNN
UGT1A1	NNN
UMOD	NNN
UNC13D	NNN
UPK3A	NNN
UROD	NNN
UROS	NNN
USH1C	NNN
USH1G	NNN
USH2A	NNN
USP9Y	NNN
VAPB	NNN
VCL	NNN
VHL	NNN
VSX2	NNN
VWF	NNN
WAS	NNN
WDPCP	NNN
WDR35	NNN
WDR36	NNN
WDR72	NNN
WHSC1L1	NNN
WNK1	NNN
WRN	NNN
WT1	NNN
XPA	NNN
XPC	NNN
XRCC3	NNN
XYLT1	NNN
XYLT2	NNN
ZEB1	NNN
ZFHX3	NNN
ZFYVE27	NNN
ZIC2	NNN
ZIC3	NNN
ZNF469	NNN
ZNF513	NNN
ZNF592	NNN

## Sheet: Table S7
Stage	Cell type	Gene	P-value	Dataset	Tissue	Species
Discovery	Alpha motor neurons	ALS-susceptibility	0.0018	Rosenberg	Spinal cord	Mouse
Discovery	Gamma motor neurons	ALS-susceptibility	0.0813	Rosenberg	Spinal cord	Mouse
Discovery	Alpha motor neurons	ALS-pathogenicity	0.132	Rosenberg	Spinal cord	Mouse
Discovery	Gamma motor neurons	ALS-pathogenicity	0.0003	Rosenberg	Spinal cord	Mouse
Replication	Alpha motor neurons	ALS-susceptibility	0.0805	Sathyamurthy	Spinal cord	Mouse
Replication	Gamma motor neurons	ALS-susceptibility	0.1114	Sathyamurthy	Spinal cord	Mouse
Replication	Alpha motor neurons	ALS-pathogenicity	0.614	Sathyamurthy	Spinal cord	Mouse
Replication	Gamma motor neurons	ALS-pathogenicity	0.0759	Sathyamurthy	Spinal cord	Mouse
Replication	Alpha motor neurons	ALS-susceptibility	0.0508	Milich	Spinal cord	Mouse
Replication	Gamma motor neurons	ALS-susceptibility	0.1133	Milich	Spinal cord	Mouse
Replication	Alpha motor neurons	ALS-pathogenicity	0.0517	Milich	Spinal cord	Mouse
Replication	Gamma motor neurons	ALS-pathogenicity	0.0308	Milich	Spinal cord	Mouse
Validation	Alpha motor neurons	ALS-susceptibility	0.0399	Andersen	Spinal cord	Human
Validation	Gamma motor neurons	ALS-susceptibility	0.0295	Andersen	Spinal cord	Human
Validation	Alpha motor neurons	ALS-pathogenicity	0.3756	Andersen	Spinal cord	Human
Validation	Gamma motor neurons	ALS-pathogenicity	0.015	Andersen	Spinal cord	Human
Stage	Cell type	Gene	P-value	P-value Pass Bonferroni correction
				< 0.05/52	< 0.01/52
Meta-analysis	Alpha motor neurons	ALS-susceptibility	6.86176e-06	Yes	Yes
Meta-analysis	Gamma motor neurons	ALS-susceptibility	0.00036	Yes	NO
Meta-analysis	Alpha motor neurons	ALS-pathogenicity	0.01547	NO	NO
Meta-analysis	Gamma motor neurons	ALS-pathogenicity	6.00188e-07	Yes	Yes

## Sheet: Table S8
Stage	Cell type	Gene	P-value	Dataset	Tissue	Species
Replication	Oligodendrocytes/OPC	ALS-susceptibility	0.0219	Sathyamurthy	Spinal cord	Mouse
Validation	Oligodendrocytes/OPC	ALS-susceptibility	0.0328	Andersen	Spinal cord	Human
Replication	Alpha.motor.neurons	SA	0.0003	Milich	Spinal cord	Mouse
Replication	Alpha.motor.neurons	SA	0.049	Sathyamurthy	Spinal cord	Mouse
Validation	Alpha motor neurons	SA	0.0132	Andersen	Spinal cord	Human
Replication	Oligodendrocytes/OPC	HMN	0.0424	Milich	Spinal cord	Mouse
Validation	Gamma motor neurons	HMN	0.0342	Andersen	Spinal cord	Human
Replication	Oligodendrocytes/OPC	SPG	0.0005	Milich	Spinal cord	Mouse
Replication	Oligodendrocytes/OPC	SPG	0.0108	Sathyamurthy	Spinal cord	Mouse
Validation	Oligodendrocytes/OPC	SPG	0.0005	Andersen	Spinal cord	Human
Replication	Oligodendrocytes/OPC	SPG	0	Skene	Brain	Mouse

## Sheet: Table S9
Mouse brain Yellow color indicated the top two cell types	Sod1 expression specificity		Mouse spinal cord	Sod1 expression specificity		Human muscle	SOD1 expression specificity
Ependyma	0.106576		Endothelial	0.318626		Adipocytes	0.139996
Endothelia	0.0962726		Gamma.motor.neurons	0.097591		Smooth.muscle.cells	0.135902
Olfactory.Ensheathing.Cells	0.0829747		Vascular.and.Leptomeningeal.Cells	0.0947909		MuSCs.and.progenitors	0.107746
Vascular.and.Leptomeningeal.Cells	0.0620943		Excitatory	0.0802965		Pericytes	0.103251
Nigral.Dopaminergic	0.0474419		Astrocyte	0.0689548		Fibroblasts	0.0996691
Hippocampal.Granule.Precursor.	0.0420511		Alpha.motor.neurons	0.0667406		Endothelial	0.0823906
Microglia	0.0396499		Committed.Oligodendroctye.Precursor.Cells	0.0660441		Mature.skeletal.muscle	0.0816814
Cerebellar.Granule.Precursor	0.0391293		Oligodendrocyte.Mature	0.0642991		B.T.NK.cells	0.0808043
Subventricular.Zone.Stem.Cell	0.036506		Inhibitory	0.061559		Platelets	0.0681463
Astrocyte	0.0364983		Oligodendroctye.Precursor.Cells	0.0527999		Macrophages	0.0463756
Cerebellar.Interneuron.Progenitor	0.0351171		Oligodendroctye.Myelinating	0.0282976		Inflammatory.macrophages	0.0279721
Mesencephalic.Tectum.Glutamatergic	0.0344323		Cerebrospinal.Fluid.Contacting.Neurons	0		Erythroblasts	0.0260657
Claustrum.Pyramidal	0.0316196		Epyndemal	0
Oligodendroctye.Precursor.Cells	0.0238448		Microglia	0
Cajal	0.023513
Migrating.Interneuron.	0.0224508
Thalamic.Gluatamatergic	0.0211815
Hippocampal.Granule.Pyramidal.CA3	0.0197588
Striatal.Medium.Spiny.Neurons	0.0195246
Oligodendroctye.Myelinating	0.0193278
Cortex.Pyramidal	0.01883
Cerebellar.Granule	0.0171555
Hippocampal.Pyramidal.	0.0170544
Purkinje.Late	0.0149556
Olfactory.Bulb.Mitral.and.Tufted	0.0148937
Purkinje.Early	0.0147497
Bergman.Glia	0.0140013
Oligodendroctye.Newly.Formed	0.0126373
Cerebellar.Interneuron.Precursor	0.0121009
Cerebellar.Interneuron.	0.0104622
Thalamic.Interneuron	0.00680629
Oligodendrocyte.Mature	0.00638831
Committed.Oligodendroctye.Precursor.Cells	0
Medulla.Glycinergic.Interneuron.	0
Medulla.Interneuron.	0
Perivivascular.Macrophage	0
Smooth.Muscle.Cells	0
Spinal.Cord.Glutamatergic.	0
Subiculum.Pyramidal	0
